# Supplementary material for: Balancing the Virulence and Antimicrobial Resistance in VISA DAP-R CA-MRSA Superbug
Source: Antibiotics (Basel). 2022 Aug 27;11(9):1159. doi: 10.3390/antibiotics11091159 (PMC9495084; doi:10.3390/antibiotics11091159)
Supplement: Supplementary file 1 [file antibiotics-11-01159-s001.zip › Table S1.pdf]

**Table S1. Total number of paired end and mate pair reads and Estimated Coverage Generated by the Trimming after the sequencing process**

| Sample | Filtered PE (M) | Filtered MP (M) | E. Coverage |
|--------|-----------------|-----------------|-------------|
| 1-S    | 8,35M (*2)      | 1,4M (*2)       | 556,75X     |
| 1-R    | 3,81M (*2)      | 3,39M (*2)      | 492,98X     |
