# Supplementary material for: Balancing the Virulence and Antimicrobial Resistance in VISA DAP-R CA-MRSA Superbug
Source: Antibiotics (Basel). 2022 Aug 27;11(9):1159. doi: 10.3390/antibiotics11091159 (PMC9495084; doi:10.3390/antibiotics11091159)
Supplement: Supplementary file 1 [file antibiotics-11-01159-s001.zip › Table S2.pdf]

**TableS2 A-B. Summary Table of Post-Assembly Statistics and Metrics generated using the Quast software**

**A) 1-S Assembly Report**

|                                | scaffolds broken | scaffolds |
|--------------------------------|------------------|-----------|
| # contigs ( $\geq 0$ bp)       | 137              | 122       |
| # contigs ( $\geq 1000$ bp)    | 24               | 9         |
| Total length ( $\geq 0$ bp)    | 2854642          | 2857722   |
| Total length ( $\geq 1000$ bp) | 2827578          | 2830658   |
| # contigs                      | 27               | 12        |
| Largest contig                 | 372493           | 1046768   |
| Total length                   | 2829856          | 2832936   |
| GC (%)                         | 32.74            | 32.74     |
| N50                            | 237590           | 696706    |
| N75                            | 123017           | 428695    |
| L50                            | 5                | 2         |
| L75                            | 9                | 3         |
| # N's per 100 kbp              | 0.21             | 108.93    |

**B) 1-R Assembly Report**

|                                | scaffolds broken | scaffolds |
|--------------------------------|------------------|-----------|
| # contigs ( $\geq 0$ bp)       | 117              | 112       |
| # contigs ( $\geq 1000$ bp)    | 27               | 22        |
| Total length ( $\geq 0$ bp)    | 2846168          | 2846625   |
| Total length ( $\geq 1000$ bp) | 2824080          | 2824537   |
| # contigs                      | 32               | 27        |
| Largest contig                 | 888452           | 1543272   |
| Total length                   | 2827637          | 2828094   |
| GC (%)                         | 32.72            | 32.72     |
| N50                            | 272869           | 1543272   |
| N75                            | 108221           | 109923    |
| L50                            | 3                | 1         |
| L75                            | 8                | 4         |
| # N's per 100 kbp              | 0.04             | 16.19     |

All statistics are based on contigs of size  $\geq 500$  bp, unless otherwise noted (e.g., "# contigs ( $\geq 0$  bp)" and "Total length ( $\geq 0$  bp)" include all contigs).
