# Supplementary material for: Balancing the Virulence and Antimicrobial Resistance in VISA DAP-R CA-MRSA Superbug
Source: Antibiotics (Basel). 2022 Aug 27;11(9):1159. doi: 10.3390/antibiotics11091159 (PMC9495084; doi:10.3390/antibiotics11091159)
Supplement: Supplementary file 1 [file antibiotics-11-01159-s001.zip › Table S3.pdf]

**Table S3. Primer set used in real time qPCR Validation**

| Primer          | Sequences (5'→3')           | Fragment Size (bp) |
|-----------------|-----------------------------|--------------------|
| <i>murF</i> -Fw | CGTCACAGGGTCTAATGGTAAA      | 224                |
| <i>murF</i> -Rw | CAATATCTGGTTGAGCGAGGTT      |                    |
| <i>hld</i> -Fw  | CTGAGTCCAAGGAACTAACTCTAC    | 235                |
| <i>hld</i> -Rw  | ATCTTGTGCCATTGAAATCA        |                    |
| <i>hla</i> -Fw  | AGGTTCCATATTGATGAATCCTG     | 321                |
| <i>hla</i> -Rw  | GCTACTTCATTATCAGGTAGTTGC    |                    |
| <i>dltA</i> -Fw | ATGTTTAGCATCAGGCGGTAC       | 247                |
| <i>dltA</i> -Rw | ACTTGGGAAACGGCTCACTAA       |                    |
| <i>mprF</i> -Fw | GAACCACCGTTTTCAACTGAA       | 244                |
| <i>mprF</i> -Rw | GTAAATCTAACTCTGGCAACCATC    |                    |
| <i>spa</i> -Fw  | AGAACAACGCAATGGTTTCA        | 215                |
| <i>spa</i> -Rw  | GATCGTCTTTAAGGCTTTGGAT      |                    |
| <i>agrA</i> -Fw | TTAACAAC TAGCCATAAGGATGTG   | 310                |
| <i>agrA</i> -Rw | CGTTACGAGTCACAGTGAAC TTAC   |                    |
| <i>icaA</i> -Fw | CATTGAACAAGAAGCCTGACA       | 301                |
| <i>icaA</i> -Rw | ATATGATTATGTAATGTGCTTGGATG  |                    |
| <i>sdrD</i> -Fw | AGTACACAGTGGGAACAGCATCA     | 225                |
| <i>sdrD</i> -Rw | CATTACCTTGAGATGATACATTCT    |                    |
| <i>gyrB</i> -Fw | CAACTATGAAACATTACAGCAGCGT   | 256                |
| <i>gyrB</i> -Rw | TGTGGCATATCCTGAGTTATATTGAAT |                    |
